# Supplementary material
Source: PubMed Central journal article supplement (PMC2843084)

## Supporting Information Table S1.

### X-ray data collection and refinement statistics

| Data Collection                   |                                 |
|-----------------------------------|---------------------------------|
| Space group                       | $C222_1$                        |
| Cell Dimensions $a, b, c$ (Å)     | $a = 73.2, b = 92.3, c = 165.7$ |
| Wavelength (Å)                    | 1.5418                          |
| Resolution Range (Å)              | 50.00 - 2.26 (2.34 - 2.26)      |
| $R_{\text{merge}}$                | 0.062 (0.182)                   |
| $I/\sigma(I)$                     | 38.6 (13.1)                     |
| Completeness (%)                  | 95.2 (90.5)                     |
| Redundancy                        | 9.4 (9.2)                       |
| No. of copies / a.s.u.            | 3                               |
| Temperature                       | 100 K                           |
| Refinement                        |                                 |
| Resolution (Å)                    | 82.76 – 2.26<br>(2.32 - 2.26)   |
| No. reflections $R_{\text{work}}$ | 24020 (1639)                    |
| No. reflections $R_{\text{free}}$ | 1299 (81)                       |
| $R_{\text{work}}$                 | 0.17 (0.16)                     |
| $R_{\text{free}}$                 | 0.23 (0.29)                     |
| No. atoms                         |                                 |
| Protein                           | 3515                            |
| Peptide                           | 376                             |
| Solvent                           | 334                             |
| R.m.s. deviations                 |                                 |
| Bond lengths(Å)                   | 0.015                           |
| Bond angles (°)                   | 1.6                             |
| Chiral (Å <sup>3</sup> )          | 0.115                           |

#### Values in parentheses represent statistics for highest resolution shell.

Diffraction data were collected from the frozen crystal at 100K with a Raxis 4++ image plate detector mounted on a Rigaku Micromax 007 rotating anode X-ray generator equipped with an AXCO capillary optic (CuK $\alpha$  radiation  $\lambda = 1.54$  Å). The diffraction data were processed with HKL2000.<sup>[1]</sup> The structure was obtained by molecular replacement with PHASER<sup>[2]</sup> using the structure of Bcl-x<sub>L</sub> from the Beclin<sup>BH3</sup>/Bcl-x<sub>L</sub> complex (PDB ID: 2P1L) as a search model. The final model was built following several rounds of building and refinement using Coot<sup>[3]</sup> and Refmac5.<sup>[4]</sup>

- [1] Z. Otwinowski, W. Minor, *Macromolecular Crystallography, Pt. A Methods in Enzymology* **1997**, 276, 307.
- [2] L. C. Storoni, A. J. McCoy, R. J. Read, *Acta Crystallogr D Biol Crystallogr* **2004**, 60, 432.
- [3] P. Emsley, K. Cowtan, *Acta Crystallogr D Biol Crystallogr* **2004**, 60, 2126.
- [4] G. N. Murshudov, A. A. Vagin, E. J. Dodson, *Acta Crystallogr D Biol Crystallogr* **1997**, 53, 240.

**Supporting Information Figure S1.** Three molecules are present in the asymmetric unit. **a)** Molecules A and B are related by a non-crystallographic dyad symmetry axis and form a domain swapped dimer similar to that reported previously.<sup>[15b]</sup> **b)** Molecule C engages a crystallographic dyad symmetry axis to also form a domain swapped dimer. The dimer interface in this case is different to that seen previously, but in both cases the BH3-binding groove is remote from and unaffected by the dimer interface.

**Supporting Information Figure S2.** Overlay of the backbone trace of Bcl-x<sub>L</sub> in complex with Bim<sup>BH3</sup> (blue) and the foldamer of molecules A (green), B (pink) and C (yellow). The orientation of the figure is as in Figure 2 and the peptide ligands have been removed. Note the variability in the conformation of helix  $\alpha$ 3 on the right hand side of the binding groove. In all three molecules of Bcl-x<sub>L</sub> in complex with the foldamer, Leu108 occludes the *h1* pocket, whilst in the Bim<sup>BH3</sup>/Bcl-x<sub>L</sub> complex Leu108 is in a different orientation accommodating Ile58 of Bim<sup>BH3</sup>.

**Supporting Information Figure S3.** Direct-binding fluorescence polarization binding assay data showing interaction of wild-type Bcl-x<sub>L</sub> (closed circles) or the Bcl-x<sub>L</sub> A142L mutant (open circles) with fluorescein-labeled ligands: **a)** **Flu-Bak<sup>BH3</sup>** (Flu-GQVGRQLAIIGDDINR-NH<sub>2</sub>), **b)** **Flu-Bad<sup>BH3</sup>** (H<sub>2</sub>N-NLWAAQRYGRELRRMSDK\*FVDSFKK-NH<sub>2</sub>; K\* = lysine, labeled on the side chain with fluorescein), and **c)** **Flu-Ahx-2** (Flu-Ahx-APC-Ala-ACPC-Arg-ACPC-Leu-ACPC-Lys- $\beta^3$ hNle-Gly-Asp-Ala-Phe-Asn-Arg-NH<sub>2</sub>; Ahx = aminohexanoic acid).

## Supplementary Figure S1

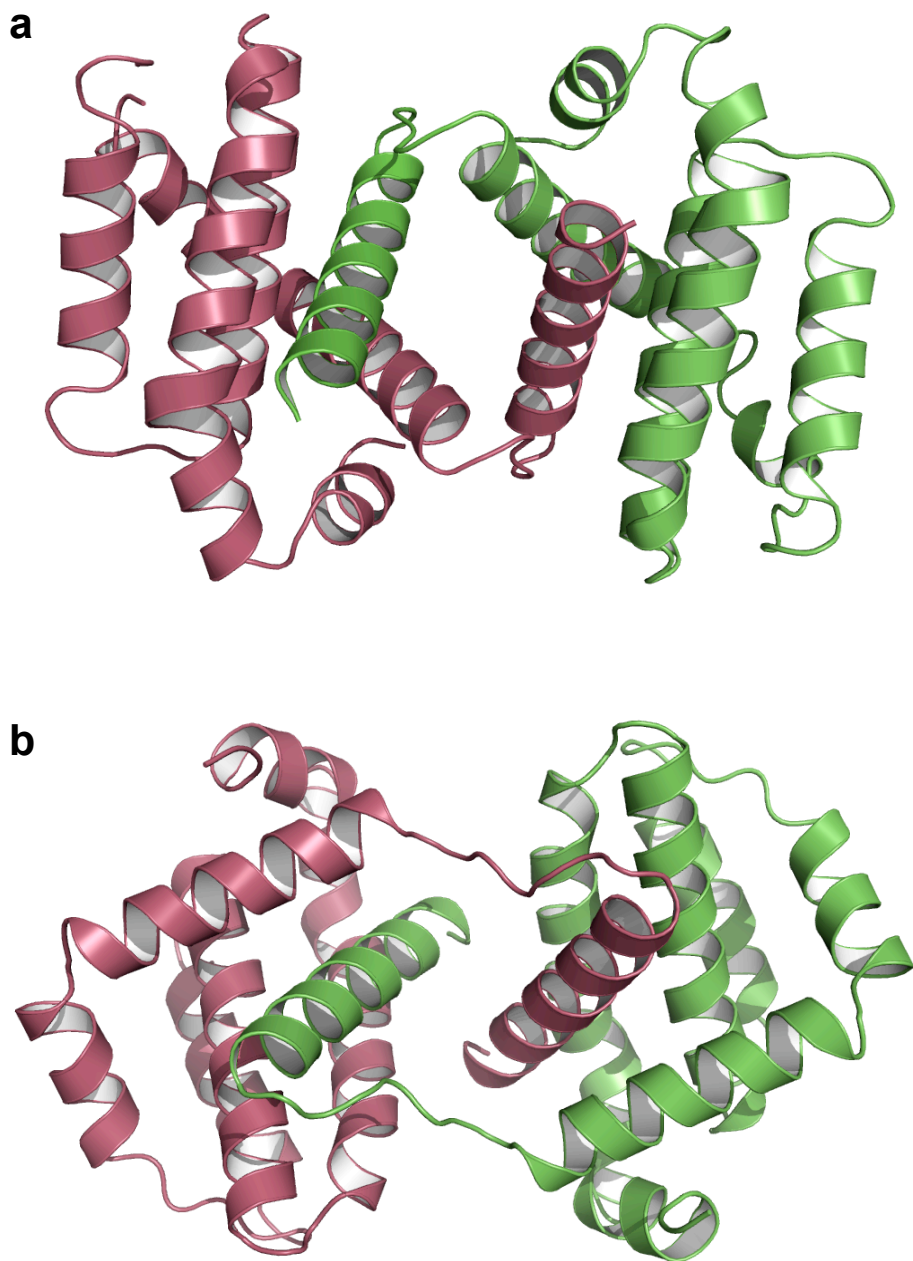

## Supplementary Figure S2

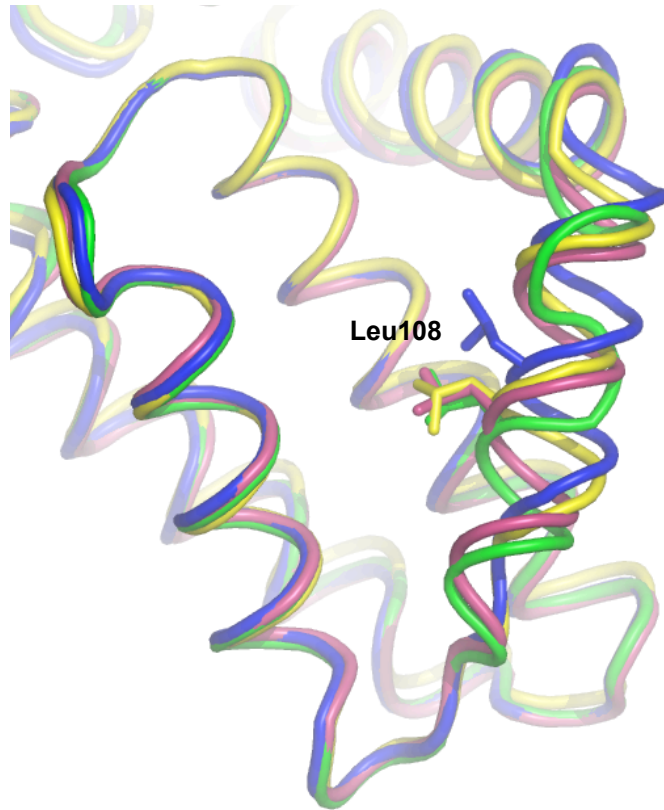

## Supplementary Figure S3

**a** (Flu-Bak<sup>BH3</sup>)

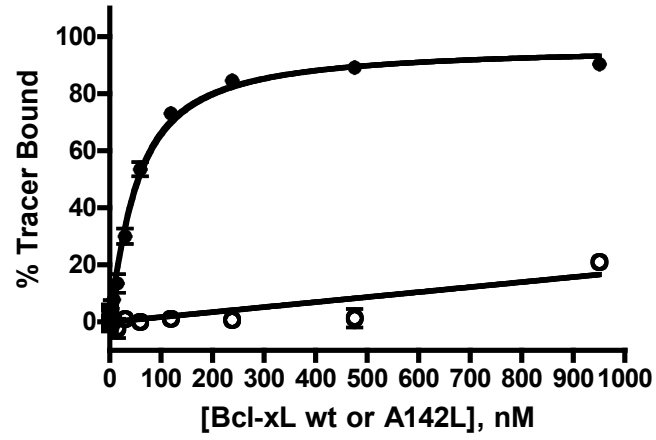

**b** (Flu-Bad<sup>BH3</sup>)

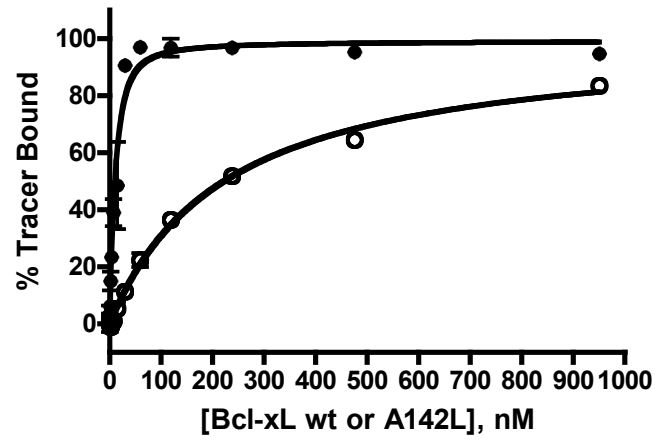

**c** (Flu-Ahx-2)

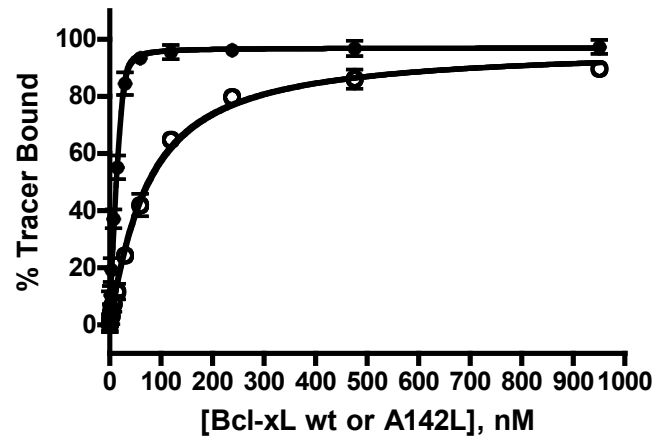

Supplement: NIHMS168556-supplement-Supplementary_Data.pdf [file NIHMS168556-supplement-Supplementary_Data.pdf]
